# Supplementary material
Source: publisher figshare collection journal article supplement (https://gsapubs.figshare.com/ndownloader/files/40861346)
Supplement: Supplementary file 1 [file 40861346]

## Sheet: Oxygen isotope composition 
Table S4. Oxygen isotope composition of quartz from the sulfide ores and footwall schist in the Angouran deposit
Spot	δ 18OV-SMOW(‰)	1σ
Double terminated quartz
AN13-26-4-1	20.9516	0.312133
AN13-26-4-2	23.5078	0.186586
AN13-26-4-3	22.5838	0.171235
AN13-26-4-4	22.8441	0.126921
AN13-26-4-5	21.7605	0.193477
AN13-26-4-6	27.1351	0.253912
AN13-26-4-7	21.7303	0.156358
AN13-26-4-8	22.1639	0.282058
AN13-26-4-9	22.3329	0.193967
AN13-26-4-10	21.6375	0.293249
AN13-26-4-11	26.1937	0.169836
AN13-26-4-12	21.3489	0.166584
AN13-26-4-13	28.3558	0.205565
AN13-26-4-14	21.9352	0.18971
AN13-26-4-15	21.8492	0.140033
AN13-26-8-1	24.6098	0.129939
AN13-26-8-2	21.2498	0.341255
AN13-26-8-3	22.2564	0.230087
AN13-26-8-4	22.5093	0.280353
AN13-26-8-5	21.3904	0.252715
AN13-26-8-6	22.9384	0.218888
AN13-26-8-7	21.2404	0.239934
AN13-26-8-8	22.5574	0.164682
AN13-26-8-9	22.2563	0.241895
AN13-26-8-10	22.1816	0.150107
AN13-26-8-11	22.6409	0.225263
AN13-26-8-12	22.2546	0.232581
AN13-26-8-13	21.1496	0.274775
AN13-26-8-14	21.4012	0.20227
AN13-26-8-15	20.3033	0.145917
AN13-26-8-16	22.1589	0.324999
AN13-26-8-17	20.5196	0.197083
AN13-26-8-18	22.0542	0.237158
Quartz in schist
AN13-36-3-1	24.4129	0.258031
AN13-36-3-2	25.0561	0.212253
AN13-36-3-3	24.4351	0.150929
AN13-36-3-4	25.4008	0.20772
AN13-36-3-5	24.9354	0.15734
AN13-36-3-6	25.1118	0.219153
AN13-36-2-1	24.8408	0.2534
AN13-36-2-2	24.4321	0.441249
AN13-36-2-3	25.0763	0.279801
AN13-36-2-4	24.971	0.264339
AN13-36-2-5	24.6263	0.139342
